# Supplementary material for: The Evolution of the Four Subunits of Voltage-Gated Calcium Channels: Ancient Roots, Increasing Complexity, and Multiple Losses
Source: PubMed Central journal article supplement — Genome Biol Evol. 2014 Aug 21;6(9):2210–7. doi: 10.1093/gbe/evu177 (PMC4202318; doi:10.1093/gbe/evu177), 2014-08-21
Supplement: supp_evu177_Supplemental_tables_Moran_and_Zakon.pdf [file supp_evu177_Supplemental_tables_Moran_and_Zakon.pdf]

**Supplemental Table 1**

| Organism                                        | Phylum/group | Protein                    | Accession    |
|-------------------------------------------------|--------------|----------------------------|--------------|
| <i>Acropora millepora</i> (stony coral)         | Cnidaria     | AmiCa <sub>v</sub> 1       | JR974719     |
|                                                 |              | AmiCa <sub>v</sub> 2a      | JT013764     |
|                                                 |              | AmiCa <sub>v</sub> 2b      | JT007682     |
|                                                 |              | AmiCa <sub>v</sub> 2c      | JR989836     |
|                                                 |              | AmiCa <sub>v</sub> 3a      | JT013008     |
|                                                 |              | AmiCa <sub>v</sub> 3b      | JR996966     |
|                                                 |              | Ami $\alpha_2\delta$       | JR983982     |
|                                                 |              | Ami $\beta$                | JT018560     |
| <i>Amphimedon queenslandica</i> (demosponge)    | Porifera     | AquCa <sub>v</sub> 1       | XP_003383036 |
| <i>Caenorhabditis elegans</i> (round worm)      | Nematoda     | CelCa <sub>v</sub> 1       | NP_001023079 |
|                                                 |              | CelCa <sub>v</sub> 2       | NP_741734    |
|                                                 |              | CelCa <sub>v</sub> 3       | AAP79881     |
|                                                 |              | Cel $\alpha_2\delta$       | P34374       |
|                                                 |              | Cel $\beta$                | NP_491193    |
| <i>Capitella teleta</i> (polychete worm)        | Annelida     | Cte $\alpha_2\delta$       | ELU02468     |
|                                                 |              | Cte $\beta$                | ELU02207     |
|                                                 |              | Cte $\gamma$               | ELT88457     |
| <i>Ciona intestinalis</i> (Ascidian)            | Chordata     | CinCa <sub>v</sub> 1       | XP_002123864 |
|                                                 |              | CinCa <sub>v</sub> 2       | XP_002123971 |
|                                                 |              | CinCa <sub>v</sub> 3       | XP_002122425 |
|                                                 |              | Cin $\alpha_2\delta$       | XP_002123859 |
|                                                 |              | CinCa <sub>v</sub> $\beta$ | XP_002129248 |
| <i>Cyanea capillata</i> (lion mane's jellyfish) | Cnidaria     | CcaCa <sub>v</sub> 1       | AAC63050     |
|                                                 |              | Cca $\beta$                | AAB87751     |
| <i>Drosophila melanogaster</i> (fruit fly)      | Arthropoda   | DmeCa <sub>v</sub> 1       | Q24270       |
|                                                 |              | DmeCa <sub>v</sub> 2       | NP_001245639 |
|                                                 |              | DmeCa <sub>v</sub> 3       | NP_001245544 |

|                                               |           |                        |              |
|-----------------------------------------------|-----------|------------------------|--------------|
| <i>Drosophila melanogaster</i><br>(fruit fly) |           | Dme $\alpha_2\delta a$ | NP_610902    |
|                                               |           | Dme $\alpha_2\delta b$ | NP_001097164 |
|                                               |           | Dme $\alpha_2\delta c$ | NP_723955    |
|                                               |           | DmeWVFAC1              | NP_611469    |
|                                               |           | Dme $\beta$            | NP_001260377 |
|                                               |           | DmNa <sub>v</sub> 1    | AAB59195     |
|                                               |           | DmNa <sub>v</sub> 2    | Q9W0Y8       |
| <i>Helobdella robusta</i> (leech)             | Annelida  | Hroy                   | ESO09520     |
| <i>Homo sapiens</i> (human)                   | Chordata  | HsaCa <sub>v</sub> 1.1 | NP_000060    |
|                                               |           | HsaCa <sub>v</sub> 1.2 | CAA12174     |
|                                               |           | HsaCa <sub>v</sub> 1.3 | NP_001122311 |
|                                               |           | HsaCa <sub>v</sub> 1.4 | NP_001243718 |
|                                               |           | HsaCa <sub>v</sub> 2.1 | NP_001120693 |
|                                               |           | HsaCa <sub>v</sub> 2.2 | NP_000709    |
|                                               |           | HsaCa <sub>v</sub> 2.3 | NP_001192222 |
|                                               |           | HsaCa <sub>v</sub> 3.1 | NP_001243260 |
|                                               |           | HsaCa <sub>v</sub> 3.2 | CAD12646     |
|                                               |           | HsaCa <sub>v</sub> 3.3 | AAM67414     |
|                                               |           | Hsa $\alpha_2\delta 1$ | NP_000713    |
|                                               |           | Hsa $\alpha_2\delta 2$ | NP_001278030 |
|                                               |           | Hsa $\alpha_2\delta 3$ | CAB75962     |
|                                               |           | Hsa $\alpha_2\delta 4$ | AAN06672     |
|                                               |           | Hsa $\beta 1$          | AAA36168     |
|                                               |           | Hsa $\beta 2$          | NP_963864    |
|                                               |           | Hsa $\beta 3$          | NP_001193846 |
|                                               |           | Hsa $\beta 4$          | NP_001139270 |
|                                               |           | HsaNa <sub>v</sub> 1.2 | Q99250       |
|                                               |           | HsaNa <sub>v</sub> 1.4 | AAO83647     |
| HsaVWFAC1                                     | NP_065976 |                        |              |
| <i>Hydra magnipapillata</i>                   | Cnidaria  | HmaCa <sub>v</sub> 1   | GAOL01025755 |
|                                               |           | HmaCa <sub>v</sub> 2   | GAOL01023479 |

|                                                     |            |                        |              |
|-----------------------------------------------------|------------|------------------------|--------------|
| <i>Hydra magnipapillata</i>                         | Cnidaria   | HmaCa <sub>v</sub> 3   | GAOL01025477 |
|                                                     |            | Hma $\alpha_2\delta$ a | GAOL01024861 |
|                                                     |            | Hma $\alpha_2\delta$ b | GAOL01020296 |
|                                                     |            | Hma $\alpha_2\delta$ c | GAOL01025603 |
|                                                     |            | Hma $\beta$            | XP_002156135 |
|                                                     |            | HmaNa <sub>v</sub> 2.1 | JQ066819     |
|                                                     |            | HmaNa <sub>v</sub> 2.5 | JQ066820     |
| <i>Lymnaea stagnalis</i> (pond snail)               | Mollusca   | LstCa <sub>v</sub> 1   | AAO83840     |
|                                                     |            | LstCa <sub>v</sub> 2   | AAO83842     |
|                                                     |            | LstCa <sub>v</sub> 3   | AFN89594     |
|                                                     |            | Lst $\beta$            | AEE65419     |
| <i>Lottia gigantea</i> (owl limpet)                 | Mollusca   | Lgia $\alpha_2\delta$  | ESP00317     |
| <i>Mnemiopsis leidyi</i> (comb jelly)               | Ctenophora | MleCa <sub>v</sub> 2   | AEF59084     |
| <i>Monosiga brevicollis</i>                         | Choanozoa  | Mbr $\beta$            | XP_001748252 |
| <i>Nematostella vectensis</i> (starlet sea anemone) | Cnidaria   | NveCa <sub>v</sub> 1   | XP_001639054 |
|                                                     |            | NveCa <sub>v</sub> 2a  | gw.15.189.1  |
|                                                     |            | NveCa <sub>v</sub> 2b  | gw.49.149.1  |
|                                                     |            | NveCa <sub>v</sub> 2c  | gw.11.380.1  |
|                                                     |            | NveCa <sub>v</sub> 3a  | XP_001628907 |
|                                                     |            | NveCa <sub>v</sub> 3b  | XP_001627598 |
|                                                     |            | Nve $\alpha_2\delta$   | XP_001636666 |
|                                                     |            | Nve $\beta$            | XP_001626057 |
|                                                     |            | NveVWFAC               | XP_001639042 |
| <i>Physalia physalis</i> (hydrozoan)                | Cnidaria   | Pph $\beta$            | ABD59026     |
| <i>Salpingoeca rosetta</i>                          | Choanozoa  | SroCa <sub>v</sub> 1/2 | XP_004989719 |
|                                                     |            | SroCa <sub>v</sub> 3   | XP_004995501 |
|                                                     |            | Sro $\beta$            | XP_004990138 |
| <i>Stylophora pistillata</i> (stony coral)          | Cnidaria   | SpiCa <sub>v</sub> 1   | AAD11470     |

|                                             |                     |                       |              |
|---------------------------------------------|---------------------|-----------------------|--------------|
| <i>Saccoglossus kowalevskii</i>             | <i>Hemichordata</i> | Skoy                  | XP_006816113 |
| <i>Thalassiosira pseudonana</i><br>(diatom) | Bacillariophyta     | TpCa <sub>v</sub>     | XP_002289136 |
| <i>Thecamonas trahens</i>                   | Apusozoa            | TtrNa <sub>v</sub> 2a | AMSG_03287.2 |
|                                             |                     | TtrNa <sub>v</sub> 2b | AMSG_06300.2 |
| <i>Trichoplax adhaerens</i>                 | Placozoa            | TadCa <sub>v</sub> 1  | XP_002108930 |
|                                             |                     | TadCa <sub>v</sub> 2  | XP_002109775 |
|                                             |                     | TadCa <sub>v</sub> 3  | XP_002109544 |
|                                             |                     | Tadβ                  | XP_002110341 |
|                                             |                     | Tadα <sub>2</sub> δ   | XP_002112661 |

**Table S1.** Ion channels used in the phylogenetic analysis. Most channels are derived from data deposited in Genbank. Some of the channels from *Nematostella vectensis* are from the genome sequencing project performed by the Joint Genome Institute (JGI) available at <http://genome.jgi-psf.org/Nemve1/Nemve1.home.html>. The channel protein model of *Thecamonas trahens* is from the Origins of Multicellularity project by the Broad Institute available at [http://broadinstitute.org/annotation/genome/multicellularity\\_project](http://broadinstitute.org/annotation/genome/multicellularity_project).

**Supplementary Table 2**

| Gene                  | Forward primer                   | Reverse primer                  |
|-----------------------|----------------------------------|---------------------------------|
| NveCa <sub>v</sub> 1  | GTAAAAGCTCTCAGAGCCTTC<br>CGAGTTC | CCAGATTGTCCACAGCAATG<br>GCCAAGA |
| NveCa <sub>v</sub> 2a | GAAGCAGTGCTCAAGATTAT<br>AGCGCTG  | ATCCTGAGGGCACGAAGCAC<br>GGATATG |
| NveCa <sub>v</sub> 2b | TATGCTCAACTTAGTTCTTGG<br>AGTCC   | GACGACGATGGCATCGATGA<br>TGTTCC  |
| NveCa <sub>v</sub> 2c | GGAACATCTTAGATTTTGCAG<br>TCGTCC  | GATTAAACTCAAGATTGAGC<br>GCATGCT |
| NveCa <sub>v</sub> 3a | GCTCCTATTGGACACTCTCCC<br>TATGCT  | CTCGACTAAGATAGCGACGA<br>GCAGGT  |
| NveCa <sub>v</sub> 3b | ATGCTGGTCTTCACCATCATA<br>TTCACA  | GTACCGAAATCCCTGAAGTG<br>GGCGTG  |

**Table S2.** Primers used to amplify Ca<sub>v</sub> fragments for *Nematostella vectensis* in situ hybridization. Primers are shown in a 5' to 3' orientation.
