# Supplementary material for: The Evolution of the Four Subunits of Voltage-Gated Calcium Channels: Ancient Roots, Increasing Complexity, and Multiple Losses
Source: PubMed Central journal article supplement — Genome Biol Evol. 2014 Aug 21;6(9):2210–7. doi: 10.1093/gbe/evu177 (PMC4202318; doi:10.1093/gbe/evu177), 2014-08-21
Supplement: supp_evu177_Supplementary_Figure_1.pdf [file supp_evu177_Supplementary_Figure_1.pdf]

## Supplementary Figure 1

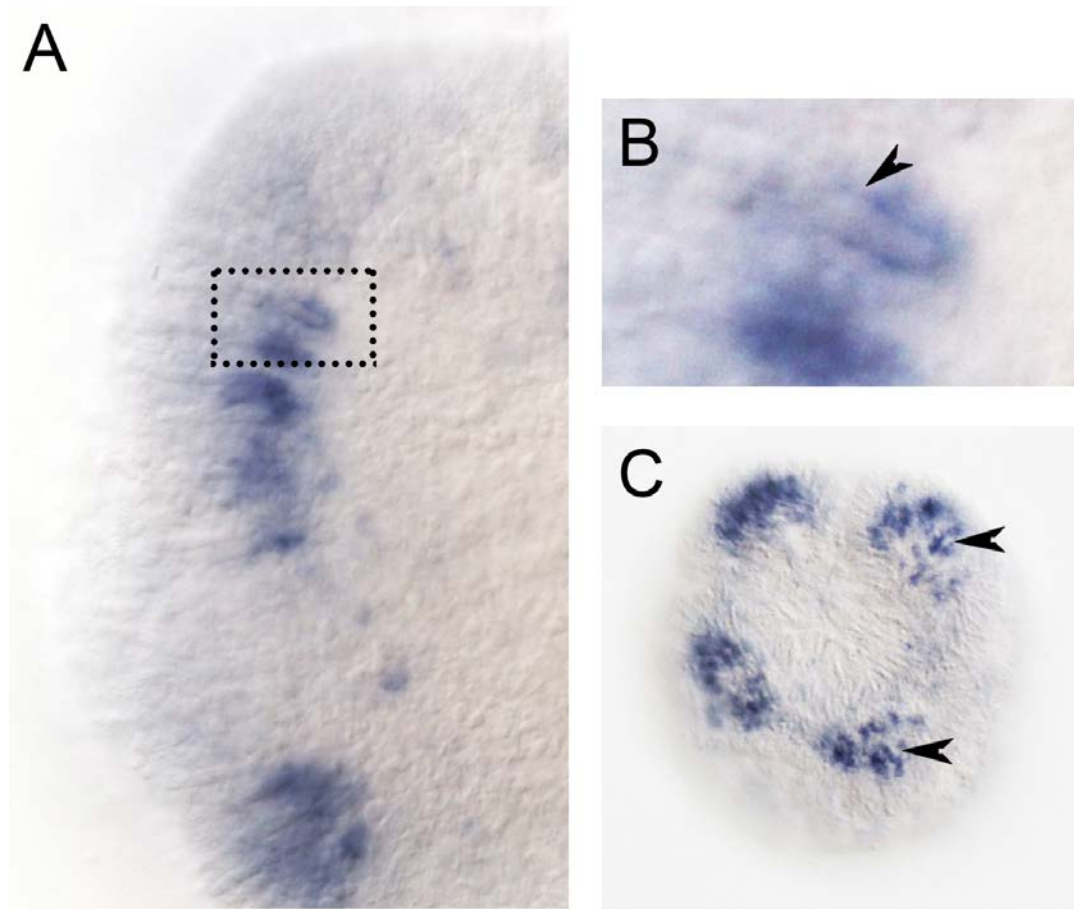

Figure Legend:  $Ca_v2a$  is expressed in nematocytes (stinging cells) as evident by the white unstained spaces surrounded by blue staining. These spaces are the nematocyst capsules that do not contain RNA. Panel A shows the oral end of a late planula. Panel B is a blowup of the region in Panel A indicated by a dashed square. Panel C shows a metamorphosing planula with four tentacle buds in an oral view. Arrowheads point towards nematocyst capsules.
